# Supplementary material for: Elevated expression of Cripto-1 correlates with poor prognosis in hepatocellular carcinoma
Source: PubMed Central journal article supplement (PMC4741514; doi:10.18632/oncotarget.5057), 2015-09-05
Supplement: oncotarget-06-35116-s001.pdf [file oncotarget-06-35116-s001.pdf]

**SUPPLEMENTARY FIGURES AND TABLE**

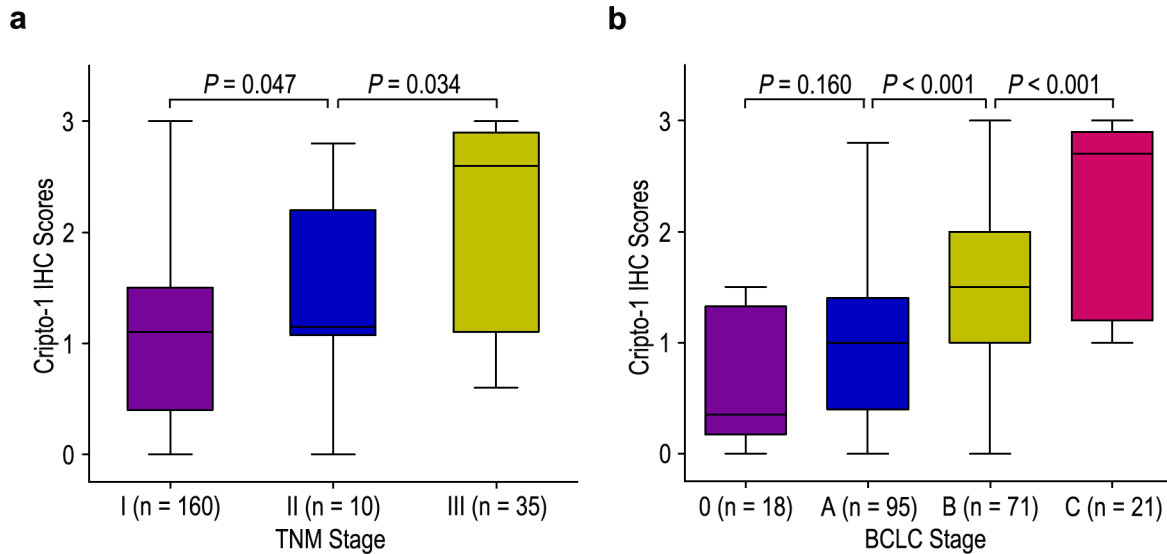

**Supplementary Figure S1: Comparison of Cripto-1 expression by TNM stage and BCLC stage.** Cripto-1 expression is markedly increased as tumors progress in TNM stage **a.** and BCLC stage **b.** Statistical analysis was performed by Student's *t*-test.

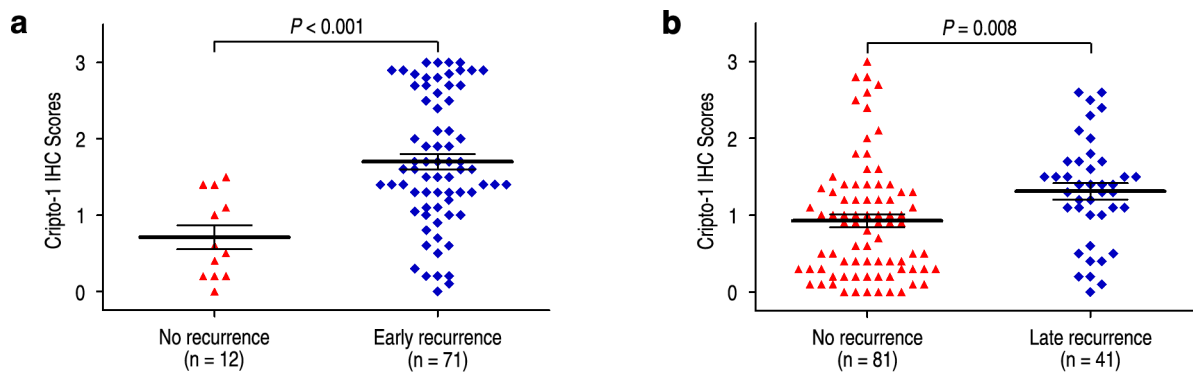

**Supplementary Figure S2: Comparison of Cripto-1 expression in HCC patients with or without recurrence.** The expression of Cripto-1 is higher in early recurrence **a.** and late recurrence **b.** patients. Statistical analysis was performed by Student's *t*-test.

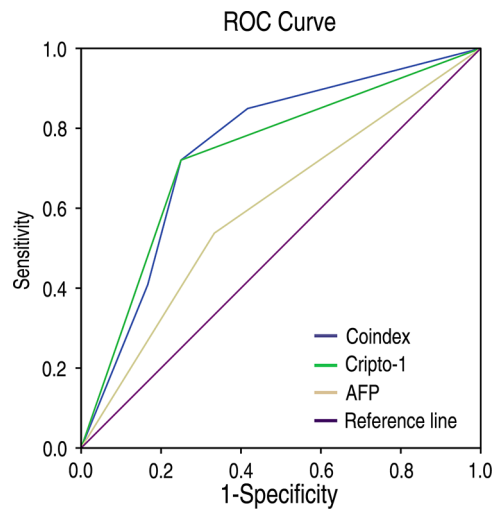

**Supplementary Figure S3: ROC curve analysis of individual markers and combination of Cripto-1 and serum AFP for discriminating early recurrence from HCC patients.** AUC was 0.602 for serum AFP ( $P = 0.251$ ), 0.735 for Cripto-1 ( $P = 0.008$ ), 0.751 for Cripto-1 and serum AFP combinations ( $P = 0.005$ ).

**Supplementary Table S1: Patient Characteristics**

| Variable                       | No. of patients (%) |
|--------------------------------|---------------------|
| No. of patients                | 205 (100)           |
| Age: Median [range], y         | 47 [13–78]          |
| <b>Gender</b>                  |                     |
| Female                         | 24 (11.7)           |
| Male                           | 181 (88.3)          |
| <b>HBsAg</b>                   |                     |
| Negative                       | 13 (6.3)            |
| Positive                       | 192 (93.7)          |
| AFP: Median [range], ng/mL     | 159.2 [0.6–121000]  |
| GGT: Median [range], U/l       | 45.0 [3.5–655.5]    |
| Tumor size: Median [range], cm | 4.5 [1.0–18.0]      |
| <b>Liver cirrhosis</b>         |                     |
| No                             | 45 (22.0)           |
| Yes                            | 160 (78.0)          |
| <b>Child-Pugh class</b>        |                     |
| A                              | 200 (97.6)          |
| B                              | 5 (2.4)             |
| <b>Tumor number</b>            |                     |
| Single                         | 189 (92.2)          |
| Multiple                       | 16 (7.8)            |
| <b>Satellite nodule</b>        |                     |
| No                             | 178 (86.8)          |
| Yes                            | 27 (13.2)           |
| <b>Tumor capsule</b>           |                     |
| No/incomplete                  | 121 (59.0)          |
| Complete                       | 84 (41.0)           |
| <b>Tumor differentiation</b>   |                     |
| I                              | 11 (5.4)            |
| II                             | 131 (63.9)          |
| III                            | 56 (27.3)           |
| IV                             | 7 (3.4)             |
| <b>Vascular invasion</b>       |                     |
| No                             | 185 (90.2)          |
| Yes                            | 20 (9.8)            |

(Continued)

| Variable                 | No. of patients (%) |
|--------------------------|---------------------|
| <b>TNM stage</b>         |                     |
| I                        | 160 (78.0)          |
| II                       | 10 (4.9)            |
| III                      | 35 (17.1)           |
| <b>BCLC stage</b>        |                     |
| 0                        | 18 (8.8)            |
| A                        | 95 (46.3)           |
| B                        | 71 (34.6)           |
| C                        | 21 (10.2)           |
| <b>Recurrence status</b> |                     |
| No                       | 93 (45.4)           |
| Early recurrence         | 78 (38.0)           |
| Late recurrence          | 34 (16.6)           |
| Late recurrence          | 34 (16.6)           |
